# Supplementary material for: Elucidating the genetic basis of an oligogenic birth defect using whole genome sequence data in a non-model organism, Bubalus bubalis
Source: PubMed Central journal article supplement (PMC5206621; doi:10.1038/srep39719), 2017-01-03
Supplement: srep39719-s1.pdf [file srep39719-s1.pdf]

**Supplementary Information: Elucidating the genetic basis of an oligogenic birth defect using whole genome sequence data in a non-model organism, *Bubalus bubalis***

Lynsey K. Whitacre, Jesse L. Hoff, Robert D. Schnabel, Sara Albarella, Francesca Ciotola, Vincenzo Peretti, Francesco Strozzi, Chiara Ferrandi, Luigi Rammuno, Tad S. Sonstegard, John L. Williams, Jeremy F. Taylor, and Jared E. Decker

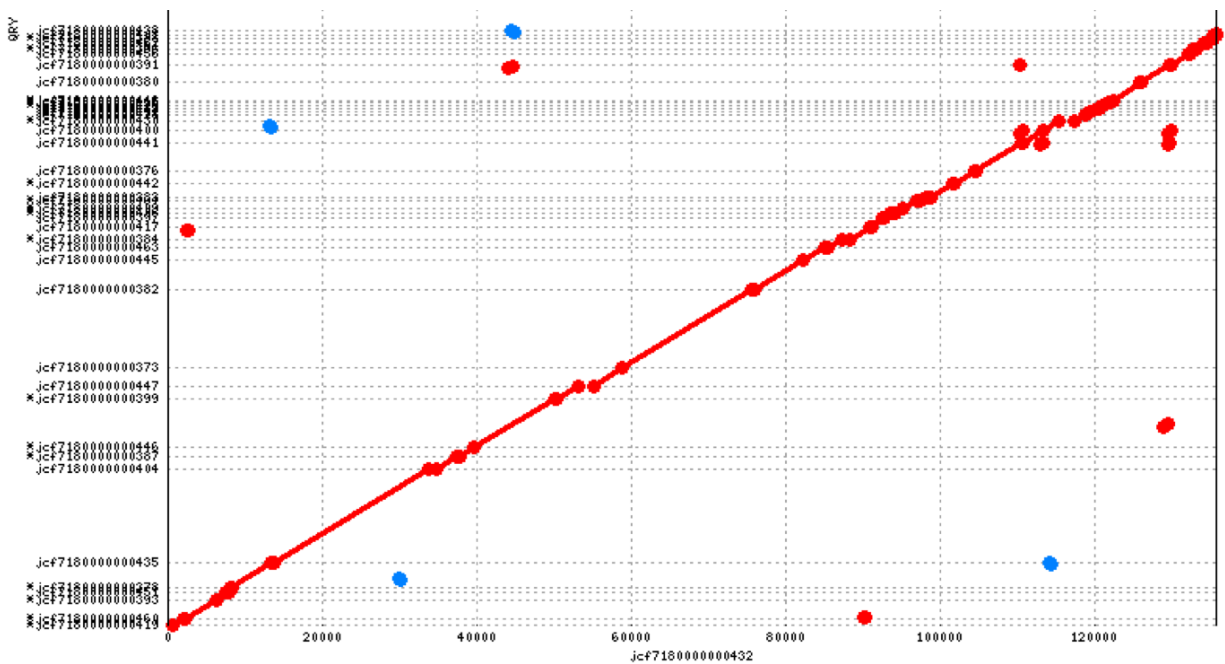

**Figure S1.** Dot plot of multiple contigs comprising the *SMARCA4* gene region in controls *versus* a single contig comprising the *SMARCA4* gene region in cases indicates increased homozygosity in *SMARCA4* in affected animals.

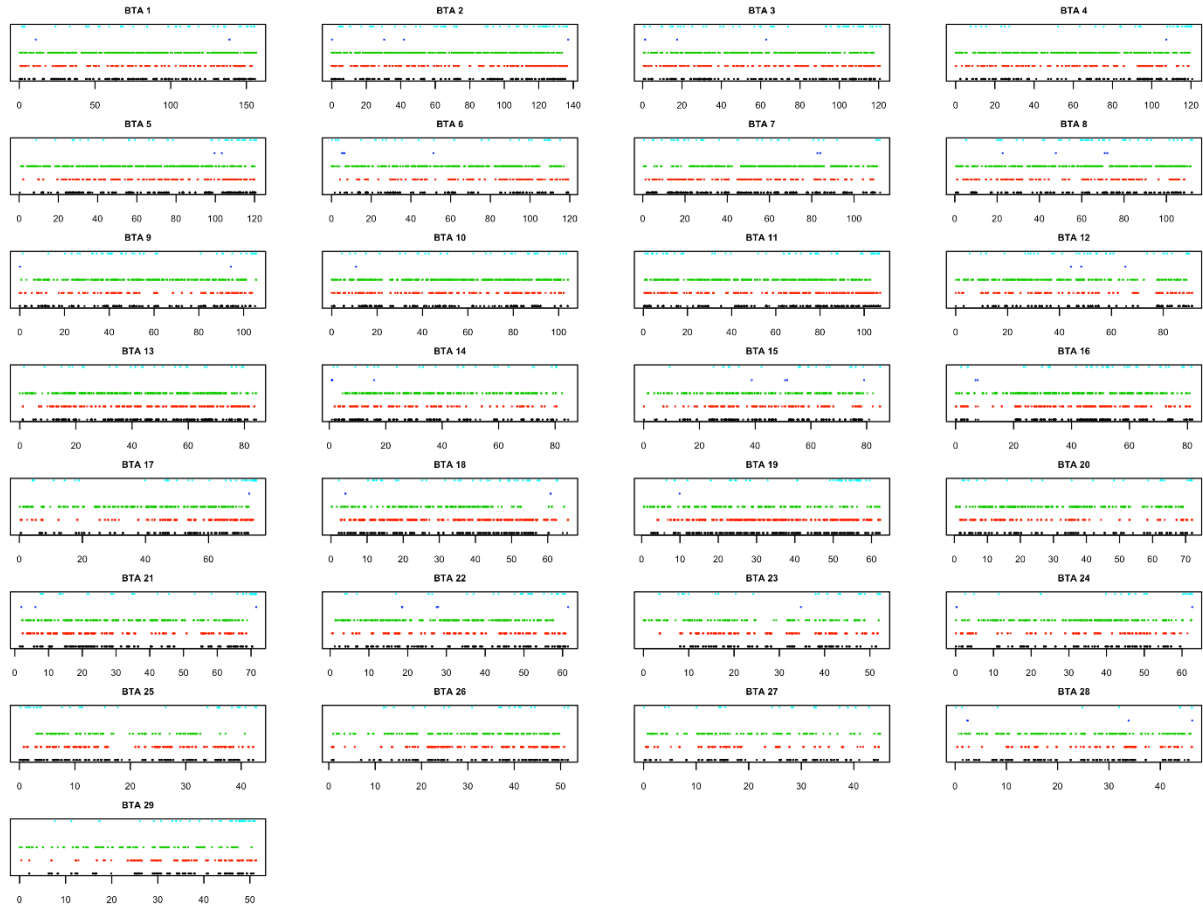

**Figure S2.** Mapping of regions significantly associated with TH to the *Bos taurus* UMD3.1 reference assembly from bilaterally affected case homozygosity mapping (black), unilaterally affected case homozygosity mapping (red), control homozygosity mapping (green), GWAS (dark blue), and SNP concordance analysis (light blue).

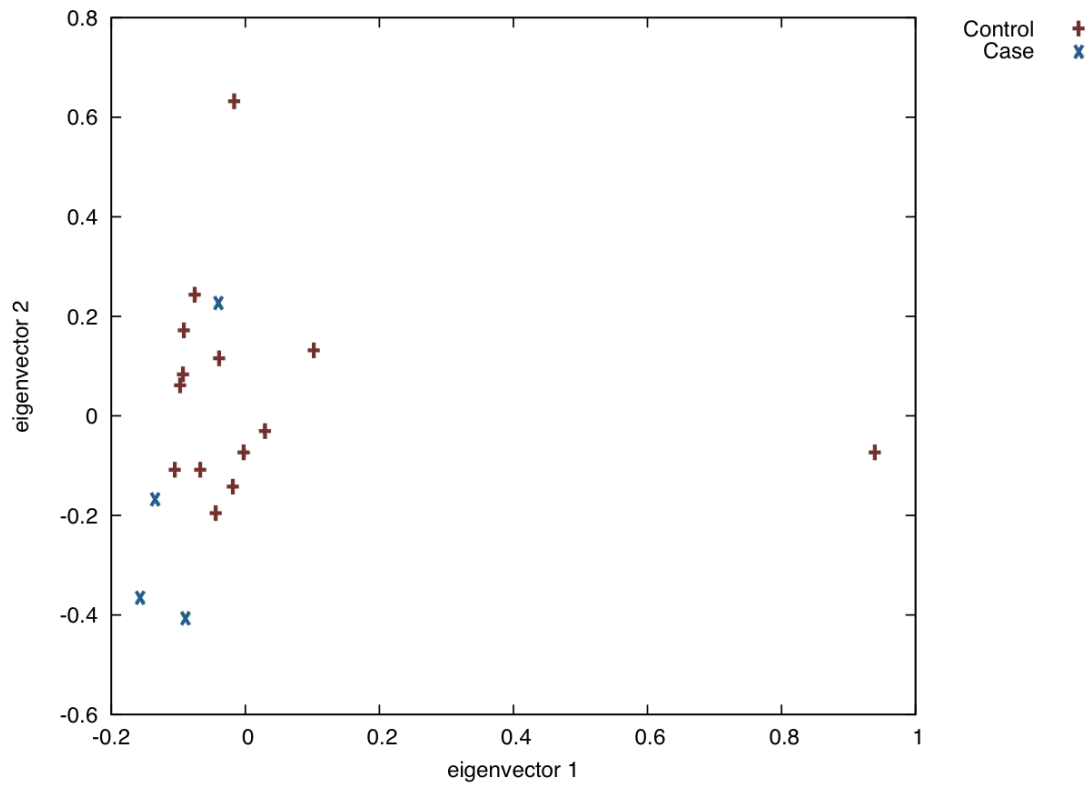

**Figure S3.** Principal component analysis of genotypes for 11 TH affected cases and 14 controls.

**Table S1.** Phenotypes and genome sequencing statistics from 11 TH affected cases and 14 unaffected controls.

| Sample ID | Total Reads* | Percent Reads Mapped | Percent Mapped with Proper Pairing | Average Genome Coverage | TH Phenotype                                  | TH Phenotype Score | SRA Sample Accession | SRA Experiment Accession | SRA Run Accession |
|-----------|--------------|----------------------|------------------------------------|-------------------------|-----------------------------------------------|--------------------|----------------------|--------------------------|-------------------|
| 189       | 472,339,399  | 99.47                | 96.08                              | 15.66                   | Unilateral case (left hindlimb at tarsus)     | 7                  | SRS1766349           | SRX2281272               | SRR4477894        |
| 190       | 249,980,539  | 98.80                | 94.47                              | 9.86                    | Unilateral case (left hindlimb at tarsus)     | 7                  | SRS1766350           | SRX2281273               | SRR4477895        |
| 196       | 395,803,651  | 99.24                | 94.74                              | 14.74                   | Unilateral case (left hindlimb at tarsus)     | 7                  | SRS1766351           | SRX2281274               | SRR4477896        |
| 246       | 269,083,067  | 98.74                | 94.44                              | 10.44                   | Unilateral case (left hindlimb at tarsus)     | 7                  | SRS1766352           | SRX2281275               | SRR4477897        |
| 337       | 318,870,658  | 98.76                | 94.85                              | 11.44                   | Bilateral case (both hindlimbs amputated)     | 0                  | SRS1766370           | SRX2281293               | SRR4477890        |
| 581       | 291,440,073  | 98.96                | 94.09                              | 11.23                   | Unilateral case (left hindlimb at metatarsus) | 8                  | SRS1766353           | SRX2281276               | SRR4477898        |
| 583       | 348,139,255  | 98.78                | 94.49                              | 11.56                   | Bilateral case (both hindlimbs at fetlock)    | 8                  | SRS1766371           | SRX2281294               | SRR4477891        |
| 662       | 372,645,970  | 99.26                | 95.09                              | 14.35                   | Unilateral case (left hindlimb)               | 5                  | SRS1766354           | SRX2281277               | SRR4477899        |
| 701       | 339,444,712  | 98.51                | 94.59                              | 12.37                   | Bilateral case (both hindlimbs at stifle)     | 2                  | SRS1766372           | SRX2281295               | SRR4477892        |
| 850       | 330,371,536  | 98.78                | 94.98                              | 12.32                   | Bilateral case (both hindlimbs amputated)     | 0                  | SRS1766373           | SRX2281296               | SRR4477893        |
| 1095      | 192,273,051  | 98.85                | 94.80                              | 7.63                    | Unilateral case (left hindlimb at metatarsus) | 8                  | SRS1766355           | SRX2281278               | SRR4477900        |
| 92764     | 237,146,401  | 99.53                | 96.45                              | 7.34                    | Control                                       | 10                 | SRS1766356           | SRX2281279               | SRR4477876        |
| 92765     | 293,097,788  | 99.50                | 96.40                              | 8.11                    | Control                                       | 10                 | SRS1766357           | SRX2281280               | SRR4477877        |
| 92766     | 278,841,904  | 99.51                | 96.37                              | 7.92                    | Control                                       | 10                 | SRS1766358           | SRX2281281               | SRR4477878        |
| 92767     | 302,482,388  | 99.56                | 96.98                              | 8.86                    | Control                                       | 10                 | SRS1766359           | SRX2281282               | SRR4477879        |
| 92768     | 235,770,765  | 99.57                | 95.60                              | 7.43                    | Control                                       | 10                 | SRS1766360           | SRX2281283               | SRR4477880        |
| 92769     | 198,150,064  | 98.38                | 95.11                              | 3.28                    | Control                                       | 10                 | SRS1766361           | SRX2281284               | SRR4477881        |
| 92770     | 290,662,225  | 99.61                | 97.35                              | 9.02                    | Control                                       | 10                 | SRS1766362           | SRX2281285               | SRR4477882        |
| 92771     | 252,165,270  | 99.62                | 97.36                              | 8.45                    | Control                                       | 10                 | SRS1766363           | SRX2281286               | SRR4477883        |
| 92774     | 328,856,248  | 99.44                | 90.37                              | 6.66                    | Control                                       | 10                 | SRS1766364           | SRX2281287               | SRR4477884        |

|         |             |       |       |      |         |    |            |            |            |
|---------|-------------|-------|-------|------|---------|----|------------|------------|------------|
| 92775   | 339,570,423 | 99.14 | 87.01 | 6.63 | Control | 10 | SRS1766365 | SRX2281288 | SRR4477885 |
| 92776   | 326,975,621 | 99.36 | 90.76 | 6.54 | Control | 10 | SRS1766366 | SRX2281289 | SRR4477886 |
| 92777   | 281,036,266 | 98.72 | 85.69 | 4.57 | Control | 10 | SRS1766367 | SRX2281290 | SRR4477887 |
| 92778   | 326,105,820 | 99.53 | 93.71 | 7.47 | Control | 10 | SRS1766368 | SRX2281291 | SRR4477888 |
| 92795   | 151,865,510 | 99.54 | 84.69 | 4.80 | Control | 10 | SRS1766369 | SRX2281292 | SRR4477889 |
| Average | 296,924,744 | 99.17 | 93.86 | 9.15 |         |    |            |            |            |

\*After quality filtering

**Table S2.** Variant call rates for cases and controls.

| <b>Sample ID</b> | <b>Missing Genotypes</b> | <b>Total Genotypes</b> | <b>Frequency of Missing</b> |
|------------------|--------------------------|------------------------|-----------------------------|
| 1095             | 705,137                  | 19,829,264             | 0.0356                      |
| 189              | 318,869                  | 19,829,264             | 0.0161                      |
| 190              | 483,836                  | 19,829,264             | 0.0244                      |
| 196              | 320,074                  | 19,829,264             | 0.0161                      |
| 246              | 428,965                  | 19,829,264             | 0.0216                      |
| 337              | 361,217                  | 19,829,264             | 0.0182                      |
| 581              | 385,264                  | 19,829,264             | 0.0194                      |
| 583              | 341,047                  | 19,829,264             | 0.0172                      |
| 662              | 287,239                  | 19,829,264             | 0.0145                      |
| 701              | 329,280                  | 19,829,264             | 0.0166                      |
| 850              | 347,345                  | 19,829,264             | 0.0175                      |
| 92764            | 1,293,640                | 19,829,264             | 0.0652                      |
| 92765            | 1,318,679                | 19,829,264             | 0.0665                      |
| 92766            | 1,204,282                | 19,829,264             | 0.0607                      |
| 92767            | 943,547                  | 19,829,264             | 0.0476                      |
| 92768            | 1,161,960                | 19,829,264             | 0.0586                      |
| 92769            | 5,517,056                | 19,829,264             | 0.2782                      |
| 92770            | 945,464                  | 19,829,264             | 0.0477                      |
| 92771            | 883,420                  | 19,829,264             | 0.0446                      |
| 92774            | 1,726,724                | 19,829,264             | 0.0871                      |
| 92775            | 1,787,533                | 19,829,264             | 0.0902                      |
| 92776            | 1,793,981                | 19,829,264             | 0.0905                      |
| 92777            | 2,860,236                | 19,829,264             | 0.1442                      |
| 92778            | 1,388,107                | 19,829,264             | 0.0700                      |
| 92795            | 2,196,779                | 19,829,264             | 0.1108                      |
| Case Mean        |                          |                        | 0.0198                      |
| Control Mean     |                          |                        | 0.0901                      |
| Total Mean       |                          |                        | 0.0592                      |

**Table S3.** *De novo* assembly statistics from pools of genome sequence data for four individuals.

| <b>Sample Group</b> | <b>Pooled Coverage</b> | <b>Total Bases in Scaffolds</b> | <b>Number of Scaffolds</b> | <b>Scaffold N50</b> |
|---------------------|------------------------|---------------------------------|----------------------------|---------------------|
| Bilateral cases     | 47.69                  | 2,645,914,807                   | 218,053                    | 36,594              |
| Unilateral cases    | 50.70                  | 2,641,090,365                   | 221,020                    | 34,411              |
| Control             | 31.96                  | 2,563,943,329                   | 541,203                    | 8,898               |

**Table S4.** Significant GWAS associations under the binary phenotype model.

| <b>Contig</b>                   | <b>Position</b> | <b>P-value</b> | <b>Candidate gene(s)</b>                    |
|---------------------------------|-----------------|----------------|---------------------------------------------|
| gi 551741020 ref NW_005765473.1 | 1041            | 4.18E-10       | --                                          |
| gi 551733415 ref NW_005773077.1 | 1806            | 1.76E-11       | --                                          |
| gi 551732811 ref NW_005773470.1 | 858             | 2.88E-20       | --                                          |
| gi 551731300 ref NW_005774981.1 | 6595            | 8.05E-11       | --                                          |
| gi 551730022 ref NW_005776259.1 | 1637            | 8.16E-14       | --                                          |
| gi 551729656 ref NW_005776625.1 | 4632            | 1.35E-08       | --                                          |
| gi 551723571 ref NW_005782710.1 | 3036            | 1.63E-11       | --                                          |
| gi 551721651 ref NW_005784628.1 | 324709          | 5.55E-19       | <i>LOC102406836</i>                         |
| gi 551720955 ref NW_005785322.1 | 62402           | 1.09E-09       | <i>LOC102402736,</i><br><i>LOC102402095</i> |
| gi 551720771 ref NW_005785506.1 | 71732           | 3.45E-10       | --                                          |
| gi 551720570 ref NW_005785701.1 | 458656          | 1.54E-10       | <i>CHAMP1</i>                               |
| gi 552101018 ref NW_005438356.1 | 524             | 1.39E-08       | --                                          |
| gi 552093047 ref NW_005445879.1 | 2664            | 2.80E-10       | --                                          |
| gi 552029652 ref NW_005499085.1 | 592             | 3.56E-12       | --                                          |
| gi 552021103 ref NW_005507230.1 | 1062            | 3.32E-12       | --                                          |
| gi 551818273 ref NW_005688295.1 | 6134            | 3.32E-12       | --                                          |
| gi 551818114 ref NW_005688454.1 | 2244            | 5.55E-19       | --                                          |
| gi 551814314 ref NW_005692254.1 | 522             | 1.91E-11       | --                                          |



**Table S5.** Significant GWAS associations under the semi-quantitative phenotype model.

| <b>Contig</b>                   | <b>Position</b> | <b>P-value</b> | <b>Candidate gene(s)</b> |
|---------------------------------|-----------------|----------------|--------------------------|
| gi 551723235 ref NW_005783046.1 | 2615            | 2.75E-10       | --                       |
| gi 551722604 ref NW_005783677.1 | 1032062         | 4.23E-10       | --                       |
| gi 551722604 ref NW_005783677.1 | 1032137         | 6.23E-10       | --                       |
| gi 551722604 ref NW_005783677.1 | 1044302         | 2.75E-10       | --                       |
| gi 551722604 ref NW_005783677.1 | 1050027         | 6.23E-10       | --                       |
| gi 551722604 ref NW_005783677.1 | 1078885         | 4.68E-10       | --                       |
| gi 551722604 ref NW_005783677.1 | 1079152         | 2.09E-10       | --                       |
| gi 551722330 ref NW_005783951.1 | 288101          | 1.54E-10       | <i>ADAMTS16</i>          |
| gi 551722330 ref NW_005783951.1 | 311320          | 4.84E-10       | <i>ADAMTS16</i>          |
| gi 551722330 ref NW_005783951.1 | 323554          | 4.68E-10       | <i>ADAMTS16</i>          |
| gi 551722330 ref NW_005783951.1 | 326651          | 4.23E-10       | <i>ADAMTS16</i>          |
| gi 551722330 ref NW_005783951.1 | 337775          | 1.54E-10       | <i>ADAMTS16</i>          |
| gi 551722330 ref NW_005783951.1 | 340646          | 2.09E-10       | <i>ADAMTS16</i>          |
| gi 551722330 ref NW_005783951.1 | 356823          | 4.45E-10       | <i>ADAMTS16</i>          |
| gi 551722330 ref NW_005783951.1 | 358391          | 6.23E-10       | <i>ADAMTS16</i>          |
| gi 551722330 ref NW_005783951.1 | 358393          | 6.23E-10       | <i>ADAMTS16</i>          |
| gi 551722330 ref NW_005783951.1 | 358958          | 2.09E-10       | <i>ADAMTS16</i>          |
| gi 551722330 ref NW_005783951.1 | 359017          | 4.26E-10       | <i>ADAMTS16</i>          |
| gi 551722330 ref NW_005783951.1 | 359399          | 2.09E-10       | <i>ADAMTS16</i>          |
| gi 551722330 ref NW_005783951.1 | 361386          | 4.64E-10       | <i>ADAMTS16</i>          |
| gi 551722330 ref NW_005783951.1 | 362978          | 4.68E-10       | <i>ADAMTS16</i>          |
| gi 551722330 ref NW_005783951.1 | 363061          | 4.93E-10       | <i>ADAMTS16</i>          |
| gi 551722330 ref NW_005783951.1 | 363067          | 4.93E-10       | <i>ADAMTS16</i>          |
| gi 551721677 ref NW_005784602.1 | 9999            | 2.09E-10       | --                       |
| gi 551721677 ref NW_005784602.1 | 59585           | 1.54E-10       | <i>PEX5L</i>             |
| gi 551721677 ref NW_005784602.1 | 59586           | 1.54E-10       | <i>PEX5L</i>             |
| gi 551721677 ref NW_005784602.1 | 59627           | 6.23E-10       | <i>PEX5L</i>             |
| gi 551721677 ref NW_005784602.1 | 76344           | 6.23E-10       | <i>PEX5L</i>             |
| gi 551721677 ref NW_005784602.1 | 83868           | 4.68E-10       | <i>PEX5L</i>             |
| gi 551721677 ref NW_005784602.1 | 84207           | 2.75E-10       | <i>PEX5L</i>             |

|                                 |         |          |                                |
|---------------------------------|---------|----------|--------------------------------|
| gi 551721677 ref NW_005784602.1 | 92660   | 5.01E-10 | <i>PEX5L</i>                   |
| gi 551721677 ref NW_005784602.1 | 94269   | 4.93E-10 | <i>PEX5L</i>                   |
| gi 551721677 ref NW_005784602.1 | 94588   | 6.23E-10 | <i>PEX5L</i>                   |
| gi 551721677 ref NW_005784602.1 | 94796   | 4.93E-10 | <i>PEX5L</i>                   |
| gi 551721677 ref NW_005784602.1 | 94970   | 5.04E-10 | <i>PEX5L</i>                   |
| gi 551721677 ref NW_005784602.1 | 95368   | 6.23E-10 | <i>PEX5L</i>                   |
| gi 551721677 ref NW_005784602.1 | 95504   | 6.23E-10 | <i>PEX5L</i>                   |
| gi 551721677 ref NW_005784602.1 | 95648   | 2.75E-10 | <i>PEX5L</i>                   |
| gi 551721677 ref NW_005784602.1 | 95764   | 2.75E-10 | <i>PEX5L</i>                   |
| gi 551721597 ref NW_005784682.1 | 930485  | 1.16E-08 | --                             |
| gi 551721597 ref NW_005784682.1 | 944705  | 1.16E-08 | --                             |
| gi 551721575 ref NW_005784704.1 | 540038  | 4.68E-10 | <i>MIER3</i>                   |
| gi 551721575 ref NW_005784704.1 | 547826  | 4.68E-10 | <i>MIER3</i>                   |
| gi 551721575 ref NW_005784704.1 | 551466  | 4.68E-10 | <i>MIER3</i>                   |
| gi 551721575 ref NW_005784704.1 | 553129  | 4.68E-10 | <i>MIER3</i>                   |
| gi 551721575 ref NW_005784704.1 | 1161864 | 6.23E-10 | <i>ANKRD55</i>                 |
| gi 551721575 ref NW_005784704.1 | 1161916 | 6.23E-10 | <i>ANKRD55</i>                 |
| gi 551721409 ref NW_005784868.1 | 68605   | 1.54E-10 | --                             |
| gi 551721409 ref NW_005784868.1 | 96621   | 1.54E-10 | --                             |
| gi 551721409 ref NW_005784868.1 | 107282  | 1.54E-10 | --                             |
| gi 551721409 ref NW_005784868.1 | 107294  | 1.54E-10 | --                             |
| gi 551721409 ref NW_005784868.1 | 130154  | 1.54E-10 | --                             |
| gi 551721409 ref NW_005784868.1 | 163189  | 1.54E-10 | --                             |
| gi 551721329 ref NW_005784948.1 | 2011086 | 1.15E-08 | <i>MIOS</i>                    |
| gi 551721209 ref NW_005785068.1 | 5901500 | 4.36E-10 | <i>ASCCI</i>                   |
| gi 551721209 ref NW_005785068.1 | 5901586 | 1.15E-09 | <i>ASSCI</i>                   |
| gi 551720917 ref NW_005785360.1 | 27661   | 4.40E-10 | <i>LOC102400491</i>            |
| gi 551720904 ref NW_005785373.1 | 6985    | 2.25E-11 | <i>FZD4</i>                    |
| gi 551720904 ref NW_005785373.1 | 572932  | 4.95E-10 | <i>TMEM135,</i><br><i>FZD4</i> |
| gi 551720881 ref NW_005785396.1 | 1623273 | 6.23E-10 | <i>FGFR1</i>                   |
| gi 551720789 ref NW_005785488.1 | 1398022 | 4.80E-10 | <i>CCSER2</i>                  |
| gi 551720688 ref NW_005785589.1 | 1335886 | 4.26E-10 | <i>SKAPI</i>                   |
| gi 551720649 ref NW_005785623.1 | 1084940 | 4.23E-10 | <i>GRM5</i>                    |

|                                 |        |          |                     |
|---------------------------------|--------|----------|---------------------|
| gi 551720521 ref NW_005785747.1 | 19920  | 1.66E-08 | <i>LOC102412685</i> |
| gi 551720521 ref NW_005785747.1 | 427178 | 1.15E-09 | <i>DDIT4</i>        |
| gi 551767899 ref NW_005738669.1 | 1277   | 2.75E-10 | --                  |

---

**Table S6.** Model statistics from binary and semi-quantitative GWAS.

|                      | <b>Binary<br/>Phenotype</b> | <b>Quantitative<br/>Phenotype</b> |
|----------------------|-----------------------------|-----------------------------------|
| Total SNPs           | 19,829,264                  | 19,829,264                        |
| Analyzed SNPs        | 2,990,419                   | 2,990,419                         |
| REMLE log-likelihood | -16.769                     | -61.328                           |
| MLE log-likelihood   | -11.789                     | -57.888                           |
| pve estimate         | 1.000                       | 1.000E-05                         |
| se(pve)              | 0.005                       | -nan                              |
| vg estimate          | 0.767                       | 9.707E-05                         |
| ve estimate          | 7.674E-06                   | 9.707                             |
| beta estimate        | 0.440                       | 7.960                             |
| se(beta)             | 0.001                       | 0.623                             |

**Table S11.** Significant results from gene ontology enrichment analysis with gProfileR.

| <b>GO Term</b>                                              | <b>GO ID</b> | <b>P-value</b> |
|-------------------------------------------------------------|--------------|----------------|
| protein binding                                             | GO:0005515   | 6.75E-14       |
| intracellular part                                          | GO:0044424   | 7.64E-13       |
| intracellular                                               | GO:0005622   | 3.58E-12       |
| system development                                          | GO:0048731   | 8.54E-12       |
| cytoplasm                                                   | GO:0005737   | 1.59E-11       |
| single-organism process                                     | GO:0044699   | 7.74E-11       |
| multicellular organism development                          | GO:0007275   | 9.95E-11       |
| positive regulation of biological process                   | GO:0048518   | 1.70E-10       |
| positive regulation of cellular process                     | GO:0048522   | 1.78E-10       |
| cellular process                                            | GO:0009987   | 5.93E-10       |
| single-organism cellular process                            | GO:0044763   | 6.86E-10       |
| positive regulation of metabolic process                    | GO:0009893   | 1.44E-09       |
| anatomical structure development                            | GO:0048856   | 1.57E-09       |
| cytosol                                                     | GO:0005829   | 1.59E-09       |
| cellular component organization or biogenesis               | GO:0071840   | 2.44E-09       |
| nervous system development                                  | GO:0007399   | 4.67E-09       |
| positive regulation of gene expression                      | GO:0010628   | 5.11E-09       |
| cell differentiation                                        | GO:0030154   | 6.94E-09       |
| developmental process                                       | GO:0032502   | 7.04E-09       |
| single-organism developmental process                       | GO:0044767   | 7.67E-09       |
| animal organ development                                    | GO:0048513   | 9.89E-09       |
| binding                                                     | GO:0005488   | 1.09E-08       |
| cellular component organization                             | GO:0016043   | 1.17E-08       |
| positive regulation of macromolecule metabolic process      | GO:0010604   | 1.19E-08       |
| cytoplasmic part                                            | GO:0044444   | 2.10E-08       |
| neurogenesis                                                | GO:0022008   | 2.22E-08       |
| organelle                                                   | GO:0043226   | 2.45E-08       |
| negative regulation of biological process                   | GO:0048519   | 2.58E-08       |
| positive regulation of nitrogen compound metabolic process  | GO:0051173   | 5.77E-08       |
| regulation of transcription from RNA polymerase II promoter | GO:0006357   | 6.38E-08       |

|                                                                         |            |          |
|-------------------------------------------------------------------------|------------|----------|
| nervous system development                                              | GO:0007399 | 8.45E-08 |
| positive regulation of macromolecule biosynthetic process               | GO:0010557 | 8.45E-08 |
| generation of neurons                                                   | GO:0048699 | 1.07E-07 |
| negative regulation of cellular process                                 | GO:0048523 | 1.20E-07 |
| regulation of signaling                                                 | GO:0023051 | 1.53E-07 |
| single-multicellular organism process                                   | GO:0044707 | 2.38E-07 |
| cellular developmental process                                          | GO:0048869 | 2.39E-07 |
| regulation of cell communication                                        | GO:0010646 | 3.43E-07 |
| programmed cell death                                                   | GO:0012501 | 4.15E-07 |
| anatomical structure morphogenesis                                      | GO:0009653 | 4.26E-07 |
| neuron differentiation                                                  | GO:0030182 | 5.08E-07 |
| positive regulation of nucleobase-containing compound metabolic process | GO:0045935 | 5.94E-07 |
| positive regulation of RNA metabolic process                            | GO:0051254 | 7.24E-07 |
| intracellular organelle                                                 | GO:0043229 | 7.43E-07 |
| transcription from RNA polymerase II promoter                           | GO:0006366 | 8.23E-07 |
| organelle part                                                          | GO:0044422 | 8.80E-07 |
| positive regulation of cellular metabolic process                       | GO:0031325 | 9.08E-07 |
| positive regulation of transcription, DNA-templated                     | GO:0045893 | 1.00E-06 |
| positive regulation of nucleic acid-templated transcription             | GO:1903508 | 1.00E-06 |
| positive regulation of biosynthetic process                             | GO:0009891 | 1.09E-06 |
| positive regulation of RNA biosynthetic process                         | GO:1902680 | 1.17E-06 |
| membrane-bounded organelle                                              | GO:0043227 | 1.33E-06 |
| intracellular membrane-bounded organelle                                | GO:0043231 | 1.33E-06 |
| intracellular organelle part                                            | GO:0044446 | 1.64E-06 |
| localization                                                            | GO:0051179 | 1.67E-06 |
| regulation of signal transduction                                       | GO:0009966 | 1.80E-06 |
| biological_process                                                      | GO:0008150 | 2.32E-06 |
| positive regulation of cellular biosynthetic process                    | GO:0031328 | 2.36E-06 |
| positive regulation of transcription from RNA polymerase II promoter    | GO:0045944 | 2.38E-06 |
| cell death                                                              | GO:0008219 | 2.48E-06 |
| apoptotic process                                                       | GO:0006915 | 2.71E-06 |
| cellular macromolecule metabolic process                                | GO:0044260 | 3.84E-06 |
| metabolic process                                                       | GO:0008152 | 8.71E-06 |

|                                                |            |          |
|------------------------------------------------|------------|----------|
| cell                                           | GO:0005623 | 9.74E-06 |
| establishment of localization in cell          | GO:0051649 | 1.06E-05 |
| cell development                               | GO:0048468 | 1.27E-05 |
| nuclear part                                   | GO:0044428 | 1.82E-05 |
| regulation of molecular function               | GO:0065009 | 2.17E-05 |
| cell part                                      | GO:0044464 | 2.41E-05 |
| cell morphogenesis involved in differentiation | GO:0000904 | 2.58E-05 |
| establishment of localization                  | GO:0051234 | 2.84E-05 |
| single-organism localization                   | GO:1902578 | 2.93E-05 |
| cellular component organization                | GO:0016043 | 3.00E-05 |
| localization                                   | GO:0051179 | 3.42E-05 |
| cellular localization                          | GO:0051641 | 3.48E-05 |
| neuron part                                    | GO:0097458 | 3.48E-05 |
| cellular metabolic process                     | GO:0044237 | 3.68E-05 |
| anatomical structure development               | GO:0048856 | 4.03E-05 |
| regulation of cell death                       | GO:0010941 | 4.25E-05 |
| cell development                               | GO:0048468 | 5.26E-05 |
| macromolecule metabolic process                | GO:0043170 | 6.37E-05 |
| transcription factor binding                   | GO:0008134 | 0.000118 |
| regulation of programmed cell death            | GO:0043067 | 0.000119 |
| cellular_component                             | GO:0005575 | 0.000122 |
| multicellular organism development             | GO:0007275 | 0.000156 |
| cellular component organization or biogenesis  | GO:0071840 | 0.000156 |
| regulation of response to stimulus             | GO:0048583 | 0.00018  |
| generation of neurons                          | GO:0048699 | 0.000189 |
| single-organism transport                      | GO:0044765 | 0.00021  |
| cellular component assembly                    | GO:0022607 | 0.000295 |
| cellular protein metabolic process             | GO:0044267 | 0.000297 |
| nuclear lumen                                  | GO:0031981 | 0.00034  |
| cell projection                                | GO:0042995 | 0.000353 |
| nucleoplasm                                    | GO:0005654 | 0.000361 |
| axon development                               | GO:0061564 | 0.000378 |
| regulation of catalytic activity               | GO:0050790 | 0.000391 |

|                                                    |            |          |
|----------------------------------------------------|------------|----------|
| regulation of metabolic process                    | GO:0019222 | 0.000393 |
| regulation of apoptotic process                    | GO:0042981 | 0.000416 |
| intracellular signal transduction                  | GO:0035556 | 0.000426 |
| neuron part                                        | GO:0097458 | 0.000456 |
| macromolecular complex binding                     | GO:0044877 | 0.000476 |
| neurogenesis                                       | GO:0022008 | 0.000477 |
| regulation of cellular component organization      | GO:0051128 | 0.000483 |
| transport                                          | GO:0006810 | 0.000485 |
| system development                                 | GO:0048731 | 0.000527 |
| sequence-specific DNA binding                      | GO:0043565 | 0.00053  |
| cell surface receptor signaling pathway            | GO:0007166 | 0.000532 |
| regulation of developmental process                | GO:0050793 | 0.000551 |
| organic substance metabolic process                | GO:0071704 | 0.000551 |
| protein binding                                    | GO:0005515 | 0.00061  |
| regulation of macromolecule metabolic process      | GO:0060255 | 0.000642 |
| intracellular organelle lumen                      | GO:0070013 | 0.000672 |
| regulation of intracellular signal transduction    | GO:1902531 | 0.000787 |
| central nervous system development                 | GO:0007417 | 0.000838 |
| synapse                                            | GO:0045202 | 0.000866 |
| single-organism cellular process                   | GO:0044763 | 0.000877 |
| movement of cell or subcellular component          | GO:0006928 | 0.000892 |
| axonogenesis                                       | GO:0007409 | 0.000903 |
| regulation of multicellular organismal development | GO:2000026 | 0.000934 |
| synaptic transmission                              | GO:0007268 | 0.000961 |
| synaptic signaling                                 | GO:0099536 | 0.000961 |
| trans-synaptic signaling                           | GO:0099537 | 0.000961 |
| cell junction                                      | GO:0030054 | 0.000992 |
| cell morphogenesis                                 | GO:0000902 | 0.001    |
| cell-cell signaling                                | GO:0007267 | 0.00107  |
| organelle lumen                                    | GO:0043233 | 0.0011   |
| cellular component morphogenesis                   | GO:0032989 | 0.00113  |
| axon guidance                                      | GO:0007411 | 0.00135  |
| neuron projection guidance                         | GO:0097485 | 0.00135  |



|                                                                                |            |         |
|--------------------------------------------------------------------------------|------------|---------|
| positive regulation of biological process                                      | GO:0048518 | 0.0017  |
| neuron development                                                             | GO:0048666 | 0.00172 |
| cytoplasm                                                                      | GO:0005737 | 0.00173 |
| developmental process                                                          | GO:0032502 | 0.002   |
| cytoplasmic part                                                               | GO:0044444 | 0.00205 |
| cell projection                                                                | GO:0042995 | 0.00217 |
| single-organism developmental process                                          | GO:0044767 | 0.00219 |
| neuron differentiation                                                         | GO:0030182 | 0.00223 |
| regulation of multicellular organismal process                                 | GO:0051239 | 0.00228 |
| cellular nitrogen compound biosynthetic process                                | GO:0044271 | 0.00238 |
| regulatory region DNA binding                                                  | GO:0000975 | 0.00239 |
| RNA polymerase II transcription factor activity, sequence-specific DNA binding | GO:0000981 | 0.0024  |
| membrane-enclosed lumen                                                        | GO:0031974 | 0.00246 |
| neuron development                                                             | GO:0048666 | 0.0025  |
| regulatory region nucleic acid binding                                         | GO:0001067 | 0.00256 |
| protein complex                                                                | GO:0043234 | 0.00303 |
| transcription regulatory region DNA binding                                    | GO:0044212 | 0.00343 |
| regulation of localization                                                     | GO:0032879 | 0.00353 |
| sensory organ development                                                      | GO:0007423 | 0.00371 |
| neuron projection                                                              | GO:0043005 | 0.00391 |
| regulation of nervous system development                                       | GO:0051960 | 0.00423 |
| binding                                                                        | GO:0005488 | 0.00435 |
| regulation of cell development                                                 | GO:0060284 | 0.00435 |
| response to organic substance                                                  | GO:0010033 | 0.00441 |
| nucleus                                                                        | GO:0005634 | 0.00445 |
| tube morphogenesis                                                             | GO:0035239 | 0.00456 |
| single-organism process                                                        | GO:0044699 | 0.00479 |
| positive regulation of cellular process                                        | GO:0048522 | 0.00484 |
| movement of cell or subcellular component                                      | GO:0006928 | 0.00507 |
| negative regulation of macromolecule metabolic process                         | GO:0010605 | 0.0052  |
| vesicle-mediated transport                                                     | GO:0016192 | 0.0054  |
| presynaptic process involved in synaptic transmission                          | GO:0099531 | 0.00554 |
| protein metabolic process                                                      | GO:0019538 | 0.00569 |

|                                                        |            |         |
|--------------------------------------------------------|------------|---------|
| regulation of cell differentiation                     | GO:0045595 | 0.00574 |
| regulation of hydrolase activity                       | GO:0051336 | 0.006   |
| cell morphogenesis involved in neuron differentiation  | GO:0048667 | 0.00616 |
| regulation of cell proliferation                       | GO:0042127 | 0.00631 |
| regulation of transport                                | GO:0051049 | 0.00647 |
| primary metabolic process                              | GO:0044238 | 0.00658 |
| tissue development                                     | GO:0009888 | 0.00672 |
| cellular response to organic substance                 | GO:0071310 | 0.00675 |
| neuron projection morphogenesis                        | GO:0048812 | 0.00712 |
| double-stranded DNA binding                            | GO:0003690 | 0.00714 |
| cellular component biogenesis                          | GO:0044085 | 0.00823 |
| neuron projection development                          | GO:0031175 | 0.00844 |
| signaling                                              | GO:0023052 | 0.00856 |
| cell projection organization                           | GO:0030030 | 0.00969 |
| single-multicellular organism process                  | GO:0044707 | 0.00969 |
| neuron projection                                      | GO:0043005 | 0.00999 |
| endomembrane system organization                       | GO:0010256 | 0.0102  |
| regulation of cellular protein metabolic process       | GO:0032268 | 0.011   |
| intracellular part                                     | GO:0044424 | 0.0113  |
| gene expression                                        | GO:0010467 | 0.0117  |
| actin filament-based process                           | GO:0030029 | 0.0118  |
| regulation of neurotransmitter levels                  | GO:0001505 | 0.0121  |
| actin cytoskeleton organization                        | GO:0030036 | 0.0128  |
| secretion                                              | GO:0046903 | 0.0128  |
| signal release                                         | GO:0023061 | 0.013   |
| single organism signaling                              | GO:0044700 | 0.013   |
| organ morphogenesis                                    | GO:0009887 | 0.0135  |
| regulation of localization                             | GO:0032879 | 0.0137  |
| organelle organization                                 | GO:0006996 | 0.0138  |
| positive regulation of cellular component organization | GO:0051130 | 0.0139  |
| regulation of cellular metabolic process               | GO:0031323 | 0.0144  |
| cell communication                                     | GO:0007154 | 0.0146  |
| negative regulation of cellular metabolic process      | GO:0031324 | 0.0147  |

|                                                                      |            |        |
|----------------------------------------------------------------------|------------|--------|
| organelle localization                                               | GO:0051640 | 0.0147 |
| neurotransmitter transport                                           | GO:0006836 | 0.015  |
| chemotaxis                                                           | GO:0006935 | 0.0153 |
| cell proliferation                                                   | GO:0008283 | 0.0154 |
| taxis                                                                | GO:0042330 | 0.0162 |
| embryo development                                                   | GO:0009790 | 0.0163 |
| signal release from synapse                                          | GO:0099643 | 0.0164 |
| neuron projection development                                        | GO:0031175 | 0.0165 |
| neurotransmitter secretion                                           | GO:0007269 | 0.0178 |
| regulation of protein metabolic process                              | GO:0051246 | 0.0182 |
| multicellular organismal process                                     | GO:0032501 | 0.0188 |
| negative regulation of metabolic process                             | GO:0009892 | 0.019  |
| tube development                                                     | GO:0035295 | 0.0196 |
| cell projection organization                                         | GO:0030030 | 0.0199 |
| positive regulation of molecular function                            | GO:0044093 | 0.0199 |
| regulation of transmembrane transport                                | GO:0034762 | 0.0214 |
| negative regulation of signaling                                     | GO:0023057 | 0.0221 |
| cell differentiation                                                 | GO:0030154 | 0.0242 |
| sequence-specific double-stranded DNA binding                        | GO:1990837 | 0.0246 |
| negative regulation of protein modification process                  | GO:0031400 | 0.0253 |
| synapse part                                                         | GO:0044456 | 0.0256 |
| regulation of cellular process                                       | GO:0050794 | 0.0285 |
| transcription regulatory region sequence-specific DNA binding        | GO:0000976 | 0.0286 |
| nitrogen compound metabolic process                                  | GO:0006807 | 0.0299 |
| macromolecular complex                                               | GO:0032991 | 0.0303 |
| regulation of anatomical structure morphogenesis                     | GO:0022603 | 0.0308 |
| macromolecular complex                                               | GO:0032991 | 0.0341 |
| cellular nitrogen compound metabolic process                         | GO:0034641 | 0.0357 |
| positive regulation of cellular component organization               | GO:0051130 | 0.0368 |
| regulation of cellular component organization                        | GO:0051128 | 0.0382 |
| locomotion                                                           | GO:0040011 | 0.0384 |
| cell                                                                 | GO:0005623 | 0.0406 |
| negative regulation of transcription from RNA polymerase II promoter | GO:0000122 | 0.0418 |

|                                           |            |        |
|-------------------------------------------|------------|--------|
| negative regulation of cell communication | GO:0010648 | 0.0422 |
| regulation of nervous system development  | GO:0051960 | 0.0422 |
| cytoskeleton organization                 | GO:0007010 | 0.0438 |
| regulation of neurogenesis                | GO:0050767 | 0.0439 |
| regulation of cell development            | GO:0060284 | 0.0449 |
| cellular protein modification process     | GO:0006464 | 0.05   |
| peroxisome organization                   | GO:0007031 | 0.05   |
| protein localization                      | GO:0008104 | 0.05   |
| protein modification process              | GO:0036211 | 0.05   |

---
